# Supplementary material for: Species-Specific Growth Models Inform Sustainable Management of Rhizophora mangle in the Colombian Caribbean Wetlands Ecology and Management
Source: Research Square preprint supplement (doi:10.21203/rs.3.rs-8245794/v1), 2025-12-04
Supplement: Supplementary file 1 [file 79db100063e1d062f0e9f97a.docx]

**Tables**

**Species-Specific Growth Models Inform Sustainable Management of *Rhizophora mangle* in the Colombian Caribbean**

Wetlands Ecology and Management

David Valderrama1, Jaime Polanía1, Valeria Aguiar1, Sergio Orrego1

1 Departamento de Ciencias Forestales, Universidad Nacional de Colombia, sede Medellín, Carrera 65 No 59A – 110, Medellín, Colombia

**Corresponding author:** David Valderrama

E-mail address: [dvalderramaca@unal.edu.co](mailto:dvalderramaca@unal.edu.co)

**Table 1.** Estimated parameters for diameter growth and diameter-height models for R. mangle

| Model | Fixed effects | | | Random effects | | | Correlation structure | | Variance structure | |
| --- | --- | --- | --- | --- | --- | --- | --- | --- | --- | --- |
| Diameter growth |  |  |  |  |  |  | |  | |
| 0.376*** | 0.571*** | 0.077*** | 0.061 | 0.048 | ARIMA(1,1,0); *** | | VarConst | |
| Diameter - Height |  |  | - |  |  | - | | VarPower; | |
| 15.593*** | 7.535*** | - | 1.215/1.118 | 0.909/1.838 |

and are the standard deviations of the random parameters y of the diameter growth model, respectively; are the standard deviations at transect level of the random parameters and , while are the standard deviations at plot level; ARIMA (p,d,q): Autoregressive Integrated Moving Average model as the correlation structure, where p, d, and q are the order of the autoregressive polynomial (AR), differencing, and moving average (MA) polynomials, respectivel; are the estimated parameters of the AR structure. VarConst refers to constant variance among the residuals, while VarPower refers to the power of variance function which accounts for increase in variance of the residuals as fitted values increases. is the parameter of the variance function.

| **Table 2.** Validation parameters for the diameter growth and diameter-height models | | | |
| --- | --- | --- | --- |
| Model | AB | MAE | ME (%) |
| Diameter growth | 0.005 | 0.147 | 99.956 |
| Diameter - Height | 0.066 | 1.278 | 68.206 |
| AB: average bias; MAE: mean absolute error; ME: model efficienc | | | |

| **Table 3.** Ontogenic traits and silvicultural parameters derived from growth models for *Rhizophora mangle’s* population in Cispatá Bay. | |
| --- | --- |
| **Parameter** | **Value** |
| Amax | 40.35 cm |
| WAGR | 0.42 cm year-1 |
| tspan | 95.12 years |
| t0.5 | 41.09 years |
| MLD | 24 cm |
| AgeMLD | 49 years |
| AgeD=10 | 24 years |
| CC | 20 years |
| Amax: maximum mean diameter or the estimated asymptote for the diameter model; WAGR: weighted absolute growth rate; tspan: lifespan; t0.5: half-life; MLD: minimum logging diameter; AgeMLD: age at which the minimum logging diameter is reached; AgeD=10: age at which the current minimum logging diameter used in Cispatá Bay (10 cm) is reached; CC: cutting cycle. | |
